# Supplementary material for: Patterned perturbation of inhibition can reveal the dynamical structure of neural processing
Source: eLife journal article supplement (doi:10.7554/elife.52757), 2020-02-19

E nullcline  
I nullcline

- Fixed point before perturbation
- Fixed point after perturbation

Patterned perturbation  
(aligned with specific eigenmode)  
Random perturbation  
(orthogonal to the specific eigenmode)

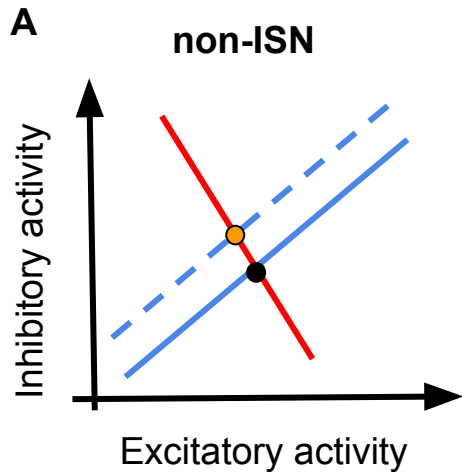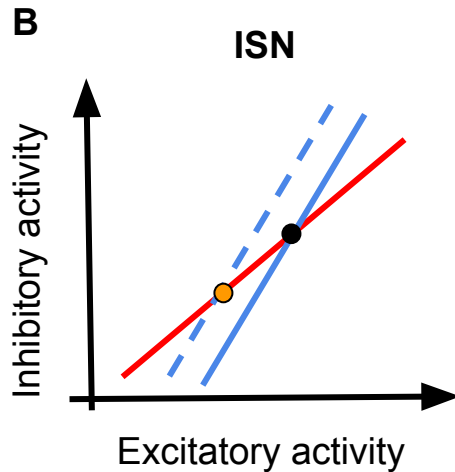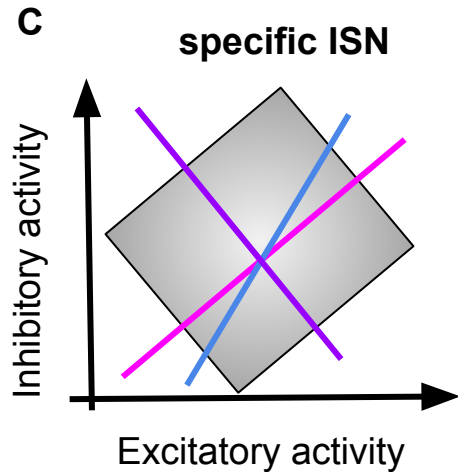

Supplement: supp [file elife-52757-supp-v1.zip]
