# Supplementary material for: Patterned perturbation of inhibition can reveal the dynamical structure of neural processing
Source: eLife journal article supplement (doi:10.7554/elife.52757), 2020-02-19

# Network without specific EI connectivity

Non-specific perturbation

**A**

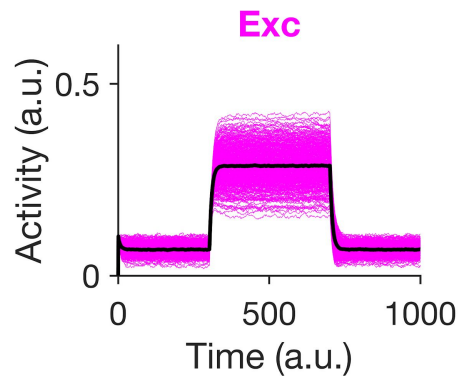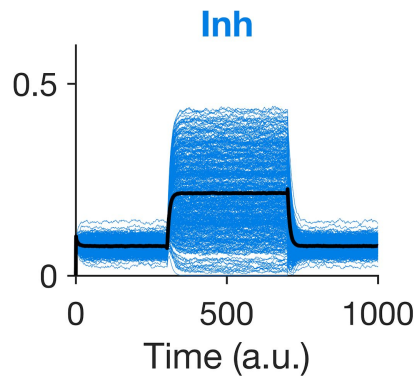

**B**

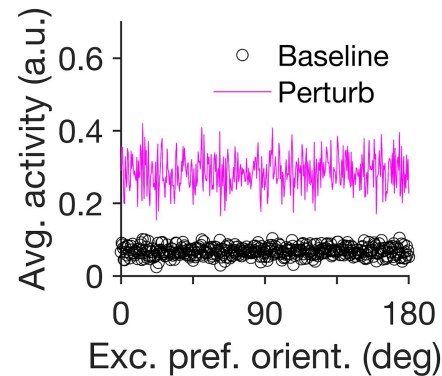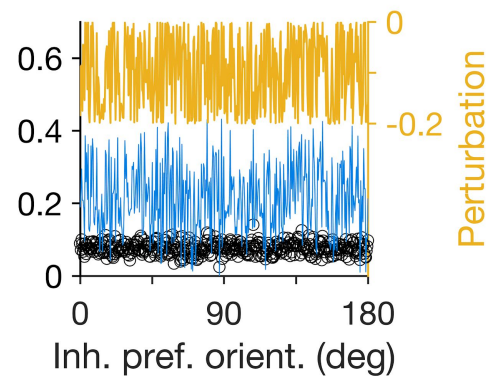

**C**

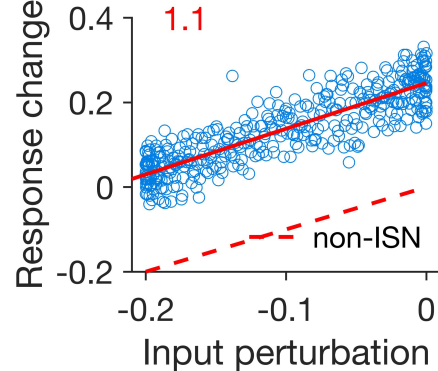

Patterned perturbation

**A**

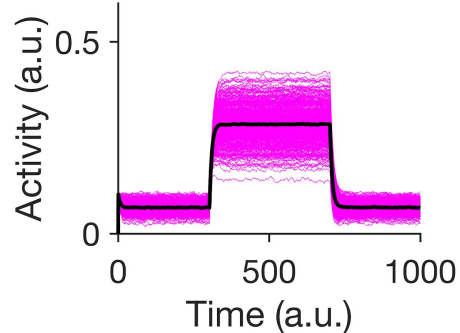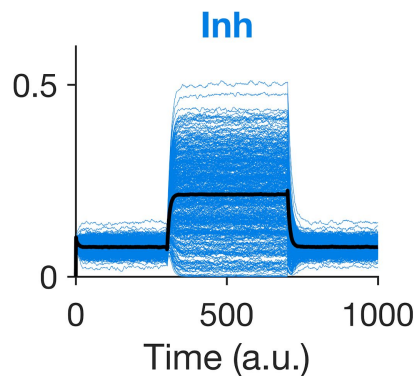

**B**

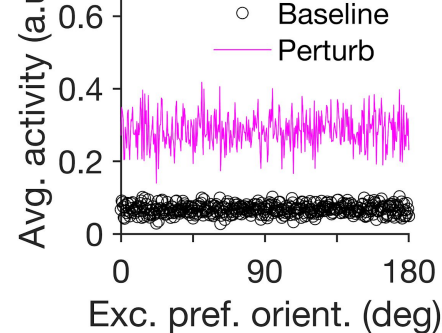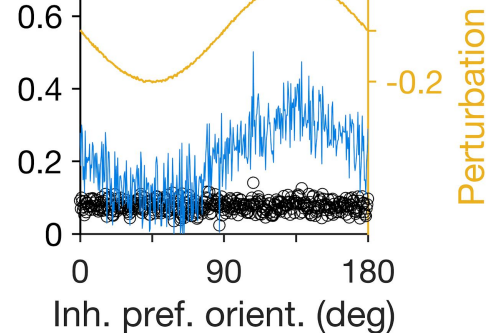

**C**

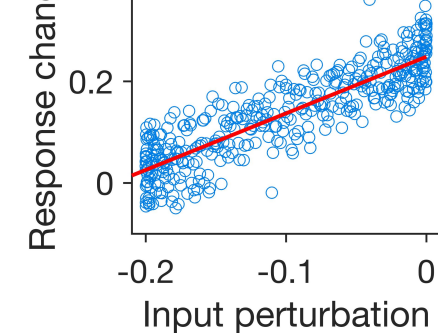

Supplement: supp [file elife-52757-supp-v1.zip]
