# Supplementary material for: Patterned perturbation of inhibition can reveal the dynamical structure of neural processing
Source: eLife journal article supplement (doi:10.7554/elife.52757), 2020-02-19
Supplement: supp [file elife-52757-supp-v1.zip]

Archive with 14 entries (14 files):
- elife_poa_e52757_Figure_4_figure_supplement_2.pdf
- elife_poa_e52757_Figure_3_figure_supplement_1.pdf
- elife_poa_e52757_Figure_2_figure_supplement_3.pdf
- elife_poa_e52757_Figure_2_figure_supplement_1.pdf
- elife_poa_e52757_Figure_4_figure_supplement_1.pdf
- elife_poa_e52757_Figure_2_figure_supplement_2.pdf
- elife_poa_e52757_Figure_2_figure_supplement_4.pdf
- elife_poa_e52757_Figure_6_figure_supplement_1.pdf
- elife_poa_e52757_Figure_5_figure_supplement_1.pdf
- elife_poa_e52757_Figure_2_figure_supplement_7.pdf
- elife_poa_e52757_Figure_2_figure_supplement_6.pdf
- elife_poa_e52757_Transparent_Reporting_File.docx
- elife_poa_e52757_Figure_2_figure_supplement_5.pdf
- elife_poa_e52757_Figure_1_figure_supplement_1.pdf
