# Supplementary material for: Patterned perturbation of inhibition can reveal the dynamical structure of neural processing
Source: eLife journal article supplement (doi:10.7554/elife.52757), 2020-02-19
Supplement: supp [file elife-52757-supp-v1.zip › elife_poa_e52757_Figure_2_figure_supplement_5.pdf]

# Heterogeneous specificity of neuronal connectivity

**A**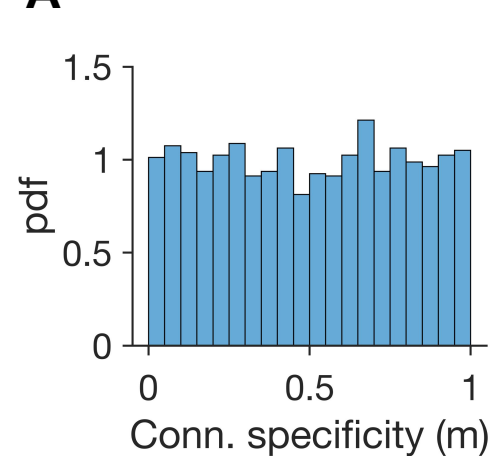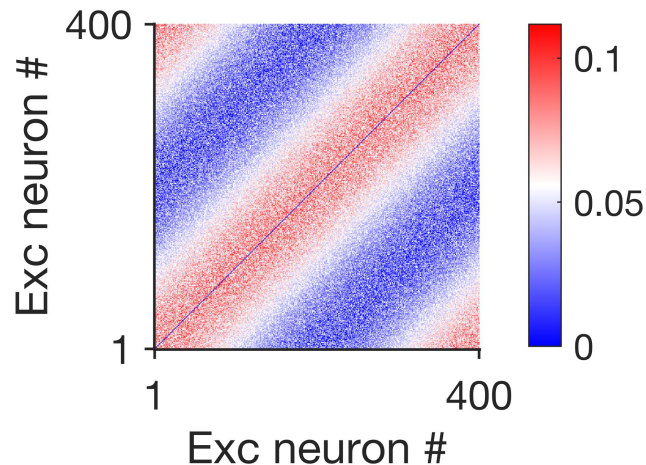**C**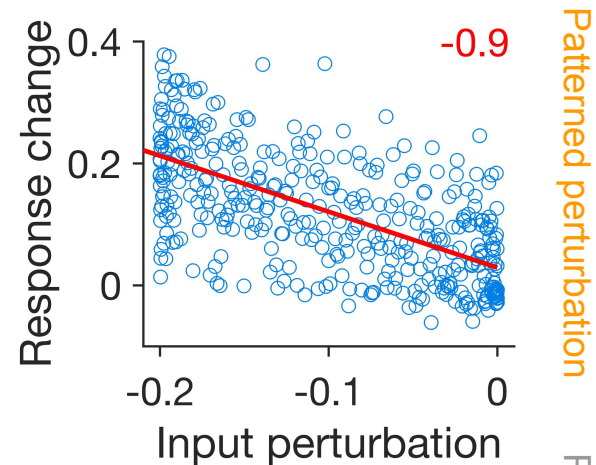

Patterned perturbation

**B**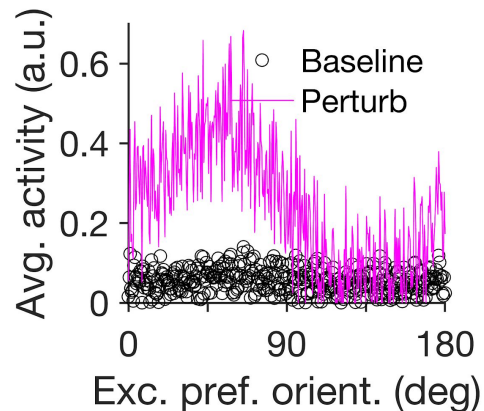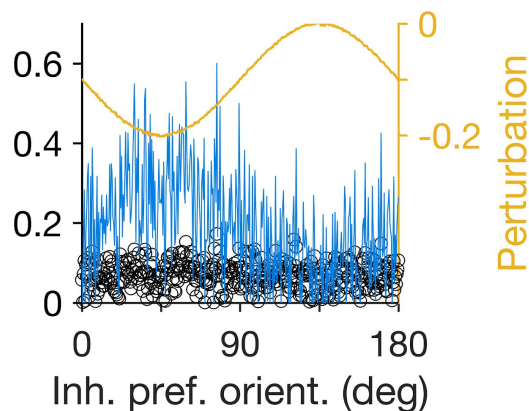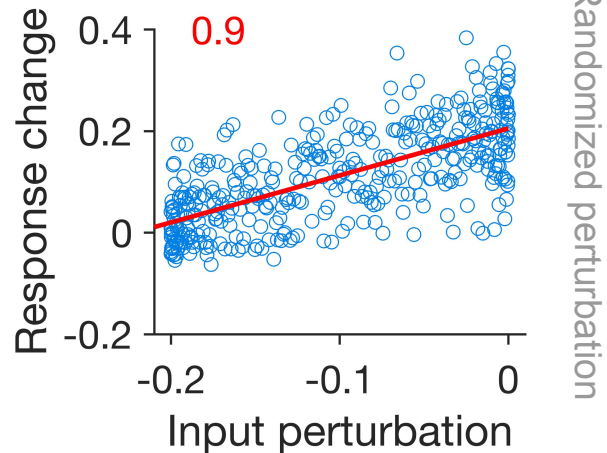

Randomized perturbation
