# Supplementary material for: Patterned perturbation of inhibition can reveal the dynamical structure of neural processing
Source: eLife journal article supplement (doi:10.7554/elife.52757), 2020-02-19

**A** 1D feature-specific connectivity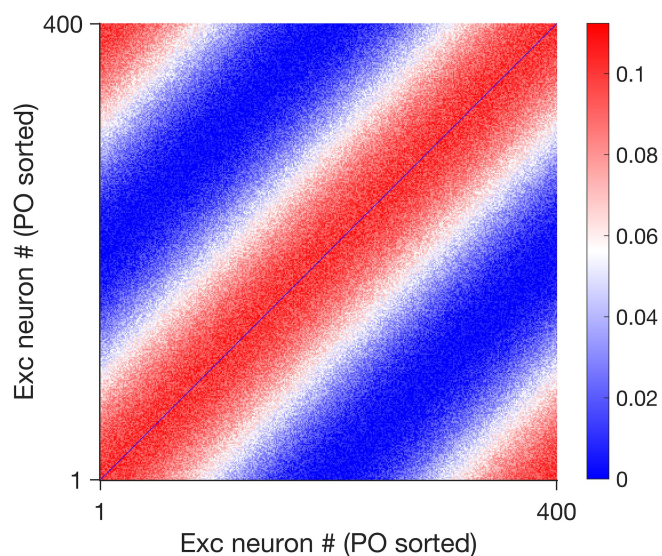**B** RF similarity-based connectivity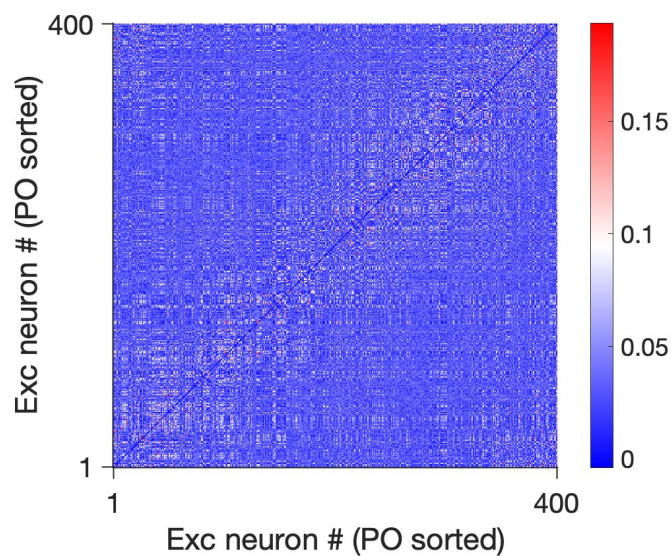**C**

Spectrum of RF similarity-based EE connectivity

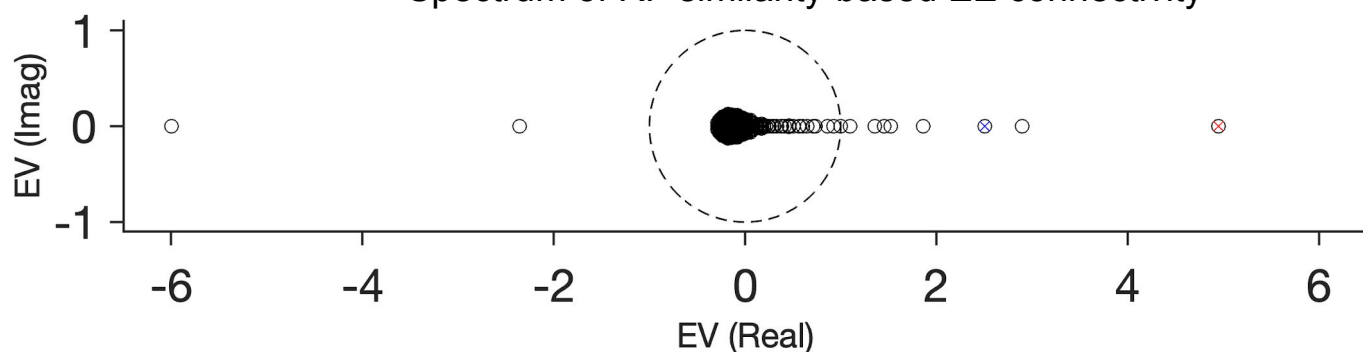**D**

CC: 0.06

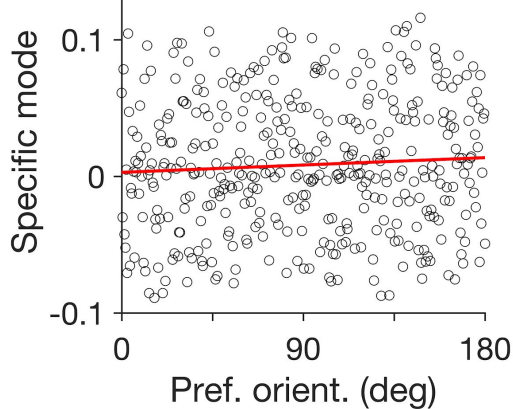

CC: 0.96

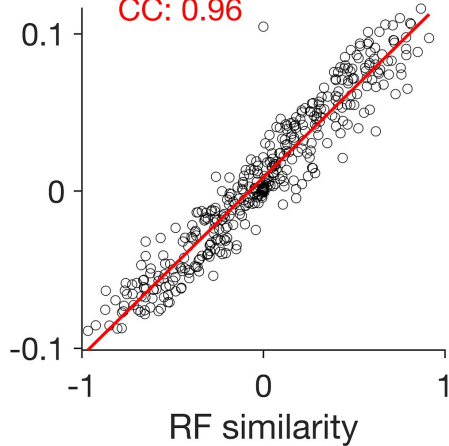**E**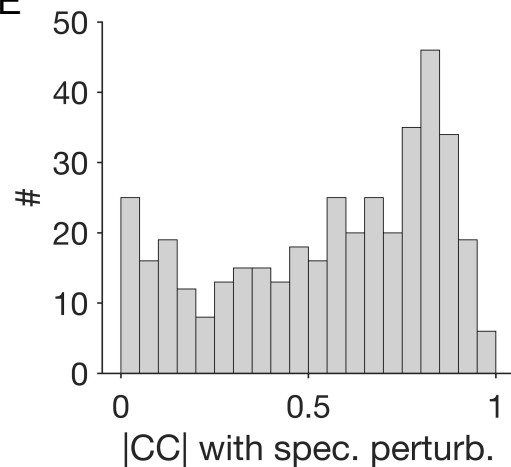**F**

CC: 0.19

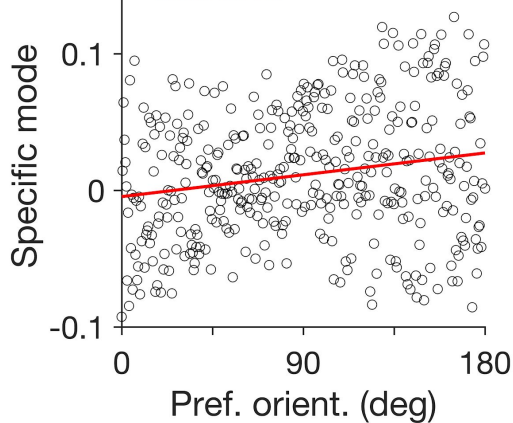

CC: 0.77

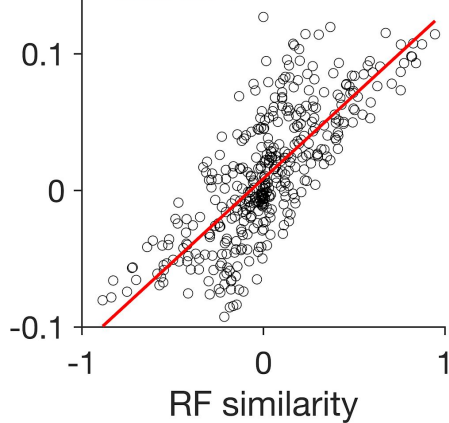**G**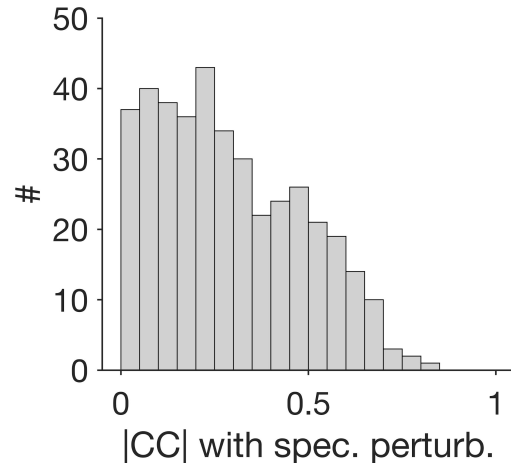

Supplement: supp [file elife-52757-supp-v1.zip › elife_poa_e52757_Figure_3_figure_supplement_1.pdf]
