# Supplementary figures and images for: Patterned perturbation of inhibition can reveal the dynamical structure of neural processing
Source: eLife journal article supplement (doi:10.7554/elife.52757), 2020-02-19

# Heterogeneous specificity of neuronal connectivity

**A**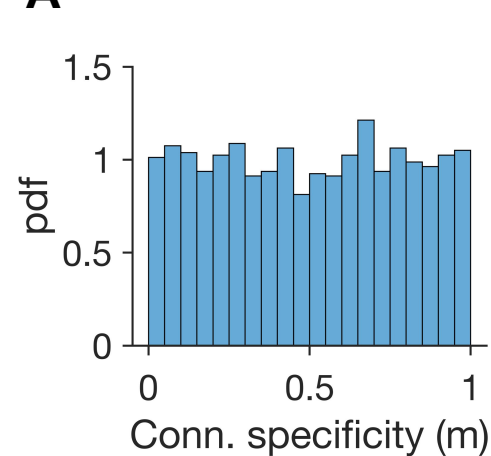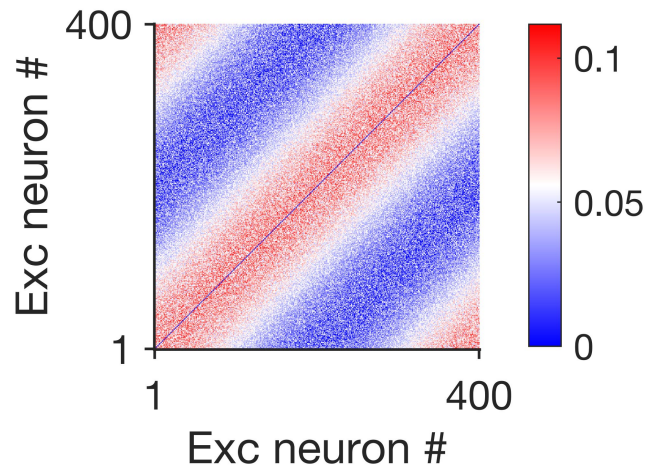**C**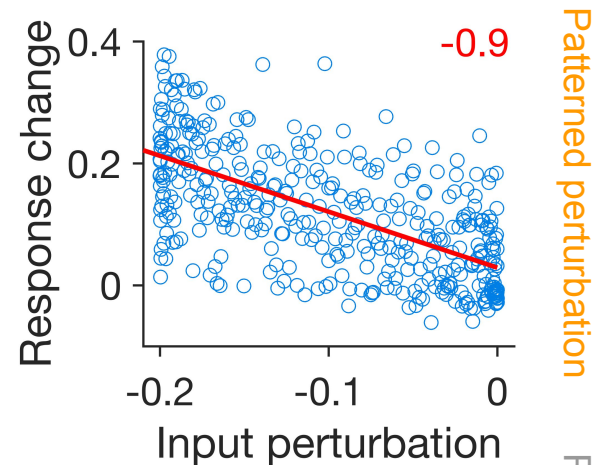**B**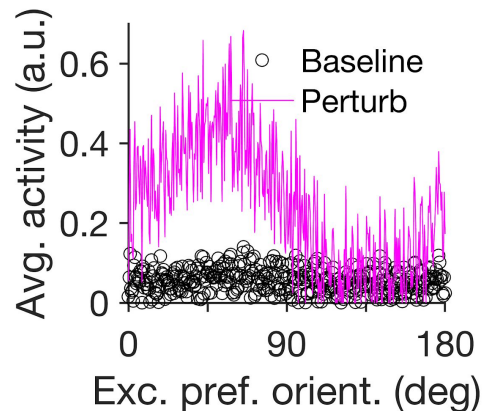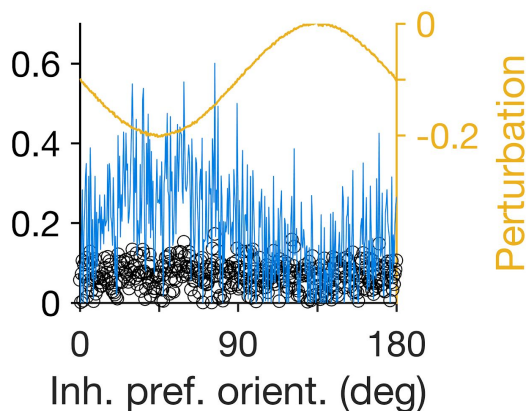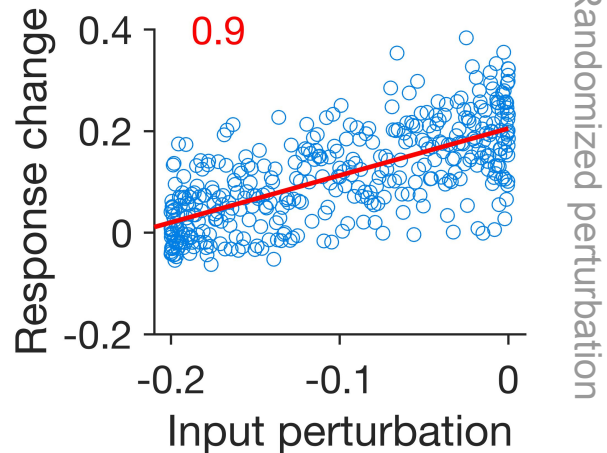

Supplement: supp [file elife-52757-supp-v1.zip]

# Positive perturbation

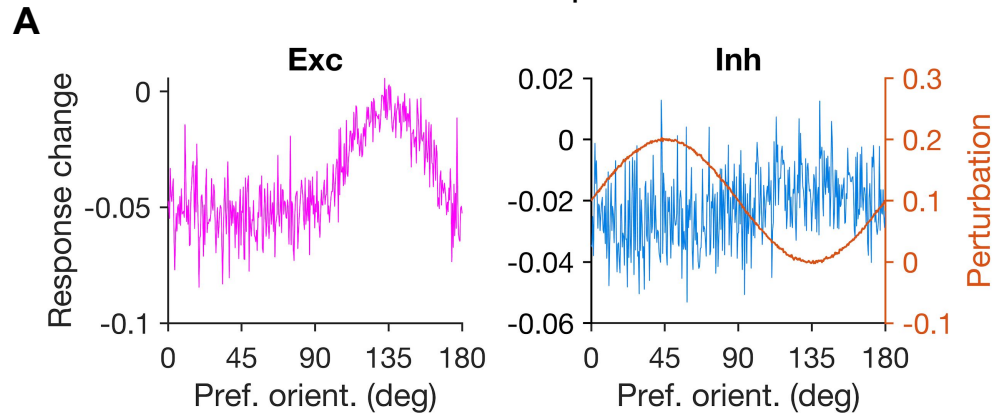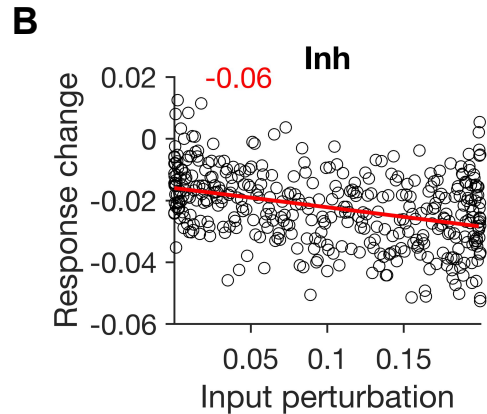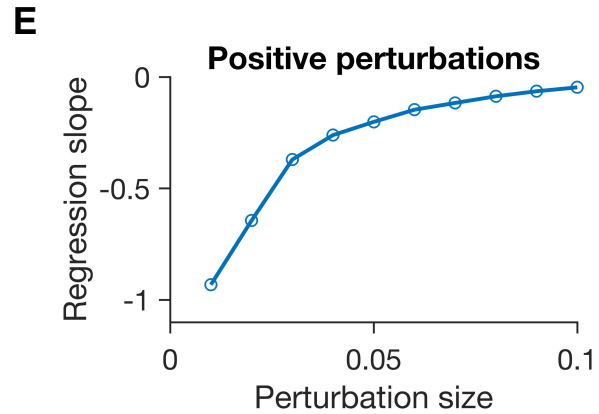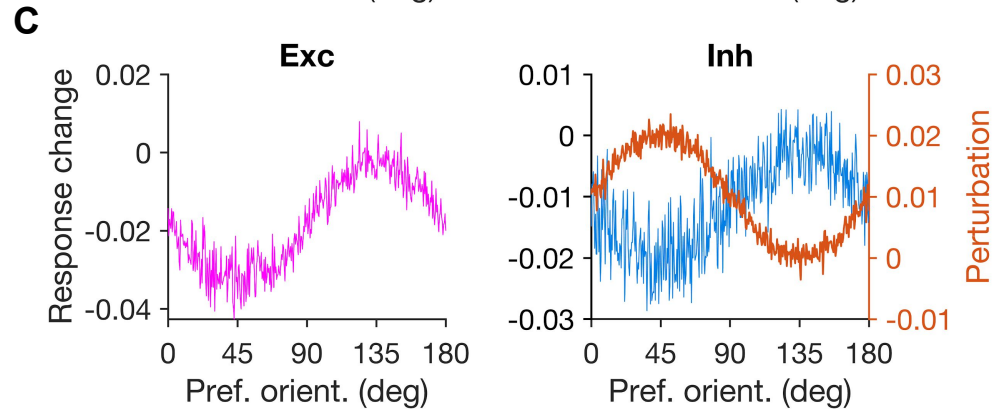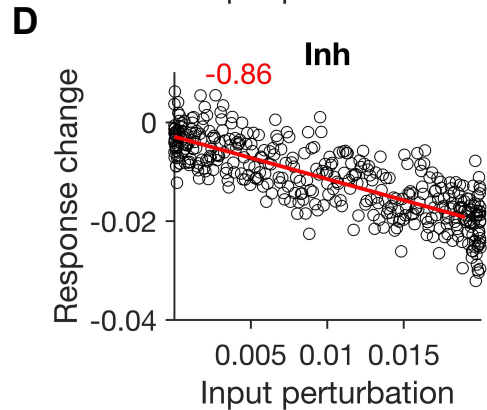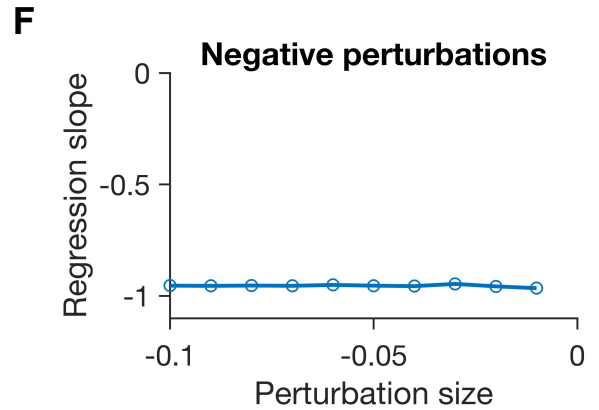

Supplement: supp [file elife-52757-supp-v1.zip]

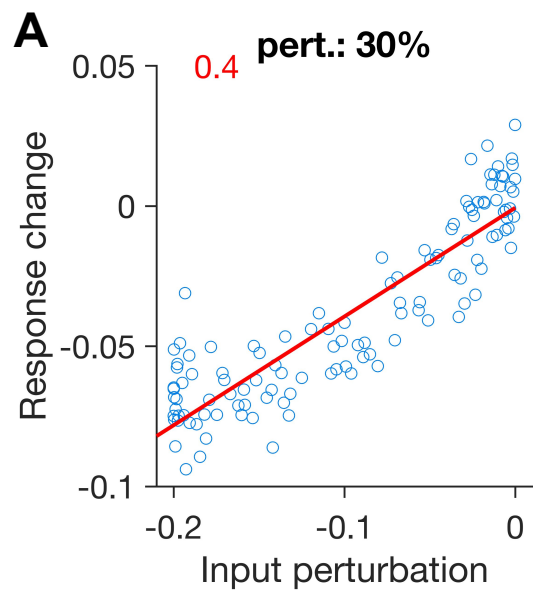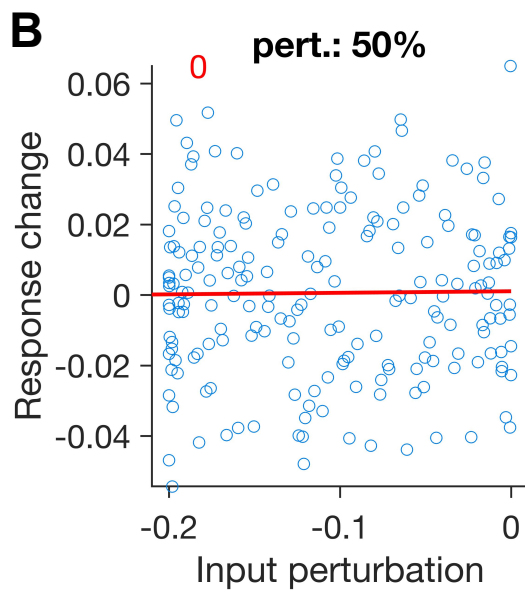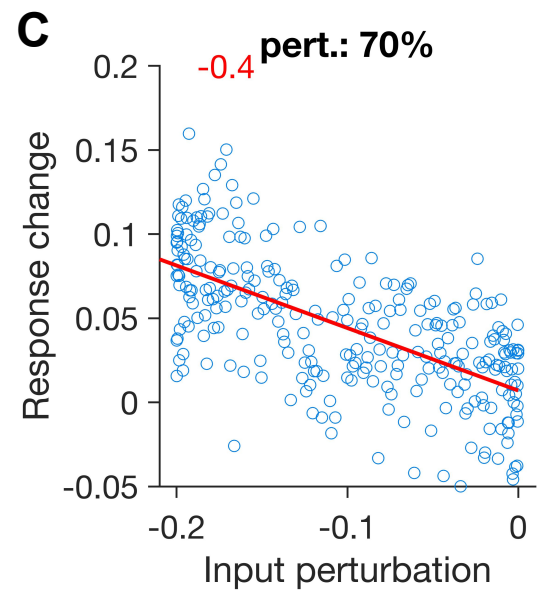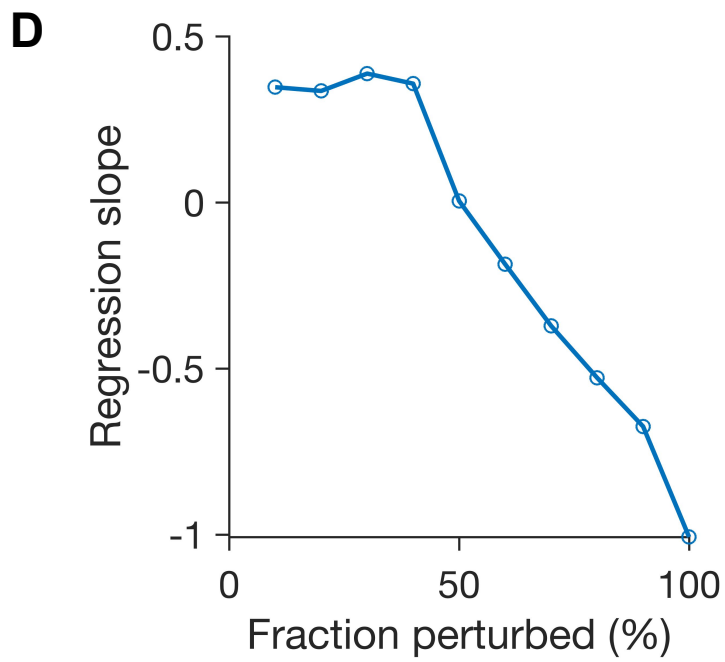

Supplement: supp [file elife-52757-supp-v1.zip]

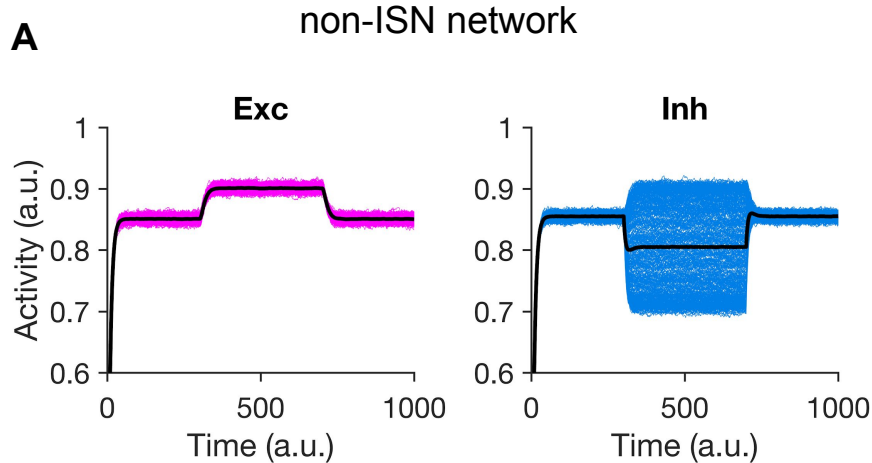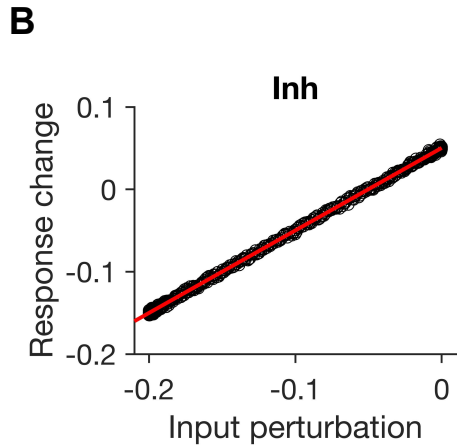

Supplement: supp [file elife-52757-supp-v1.zip]

**A**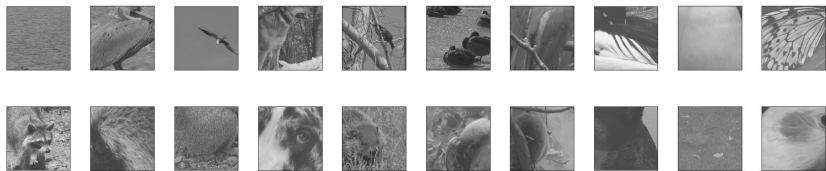**B**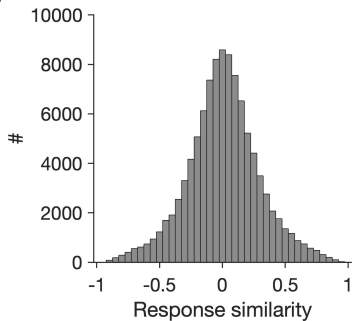**C**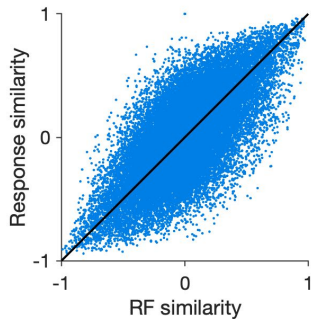**D**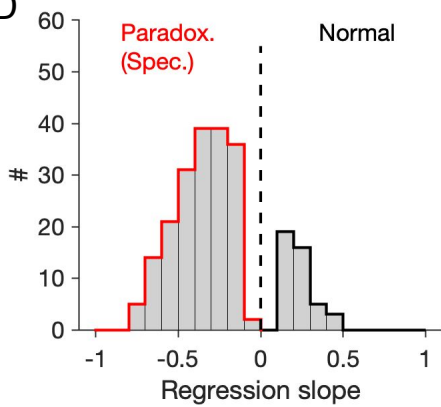**E**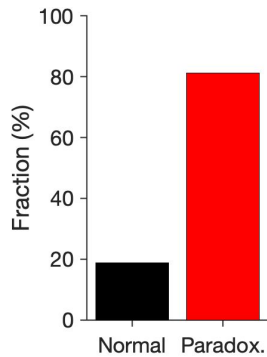

Supplement: supp [file elife-52757-supp-v1.zip]

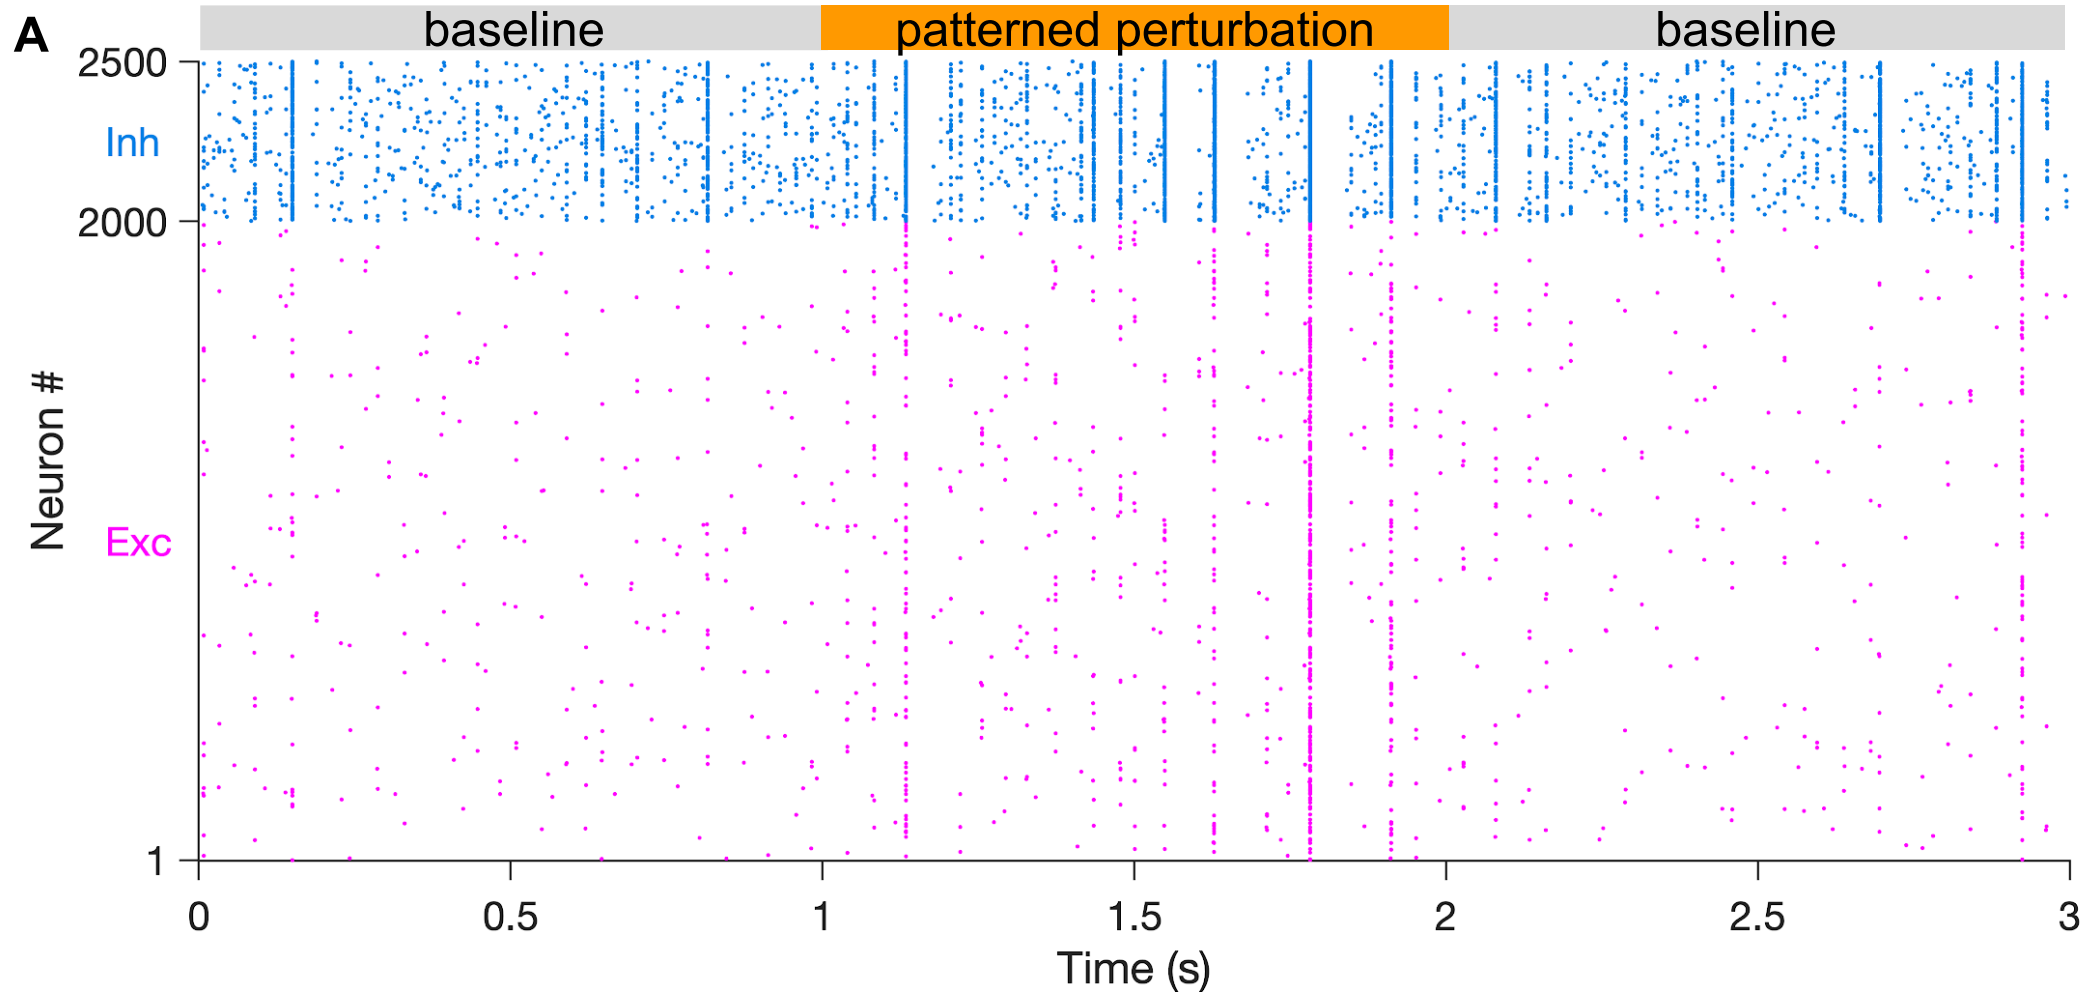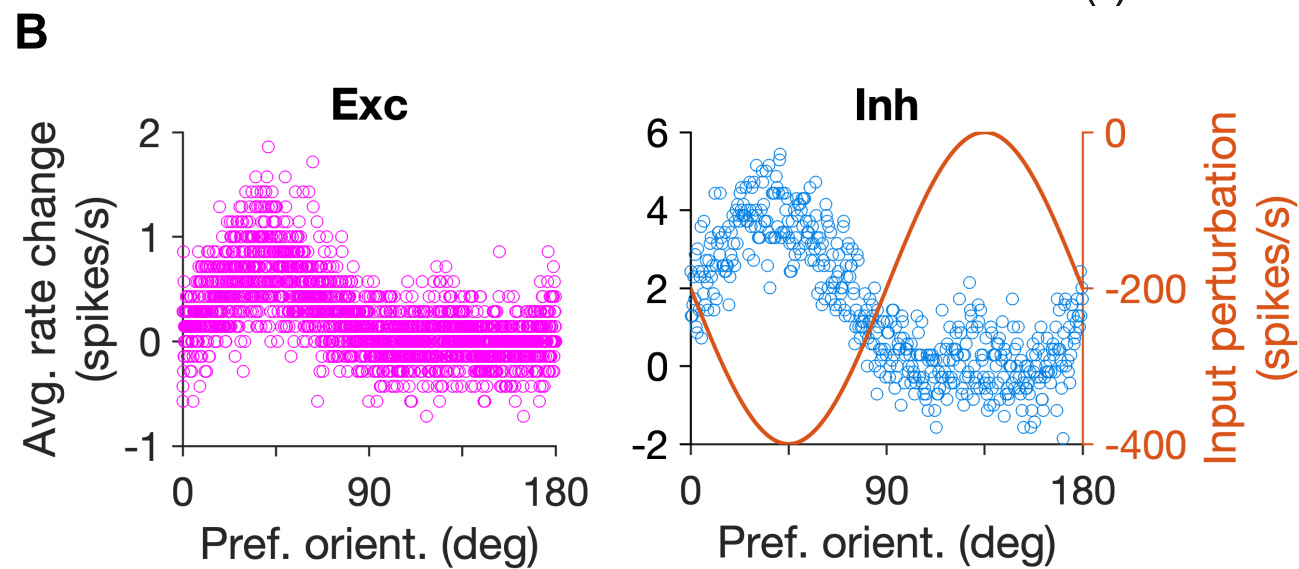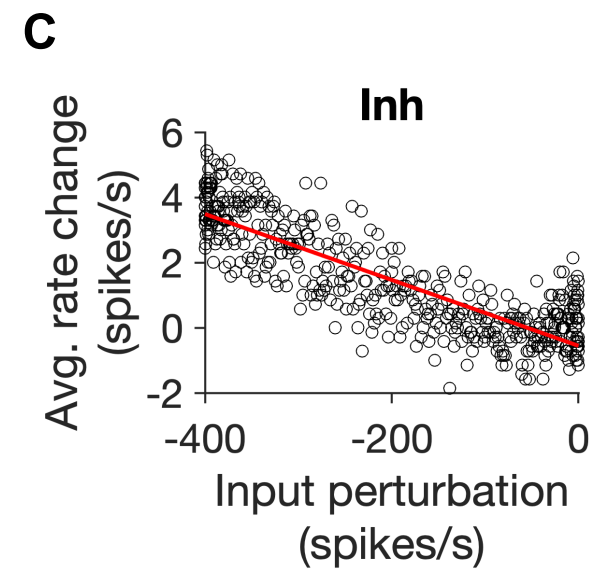

Supplement: supp [file elife-52757-supp-v1.zip]

A

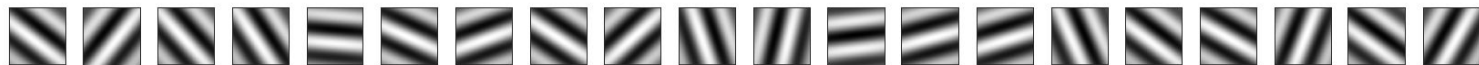

B

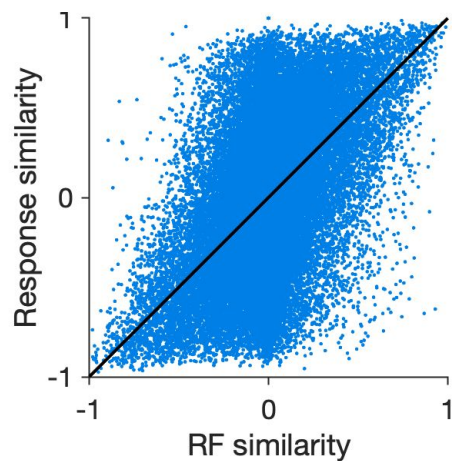

C

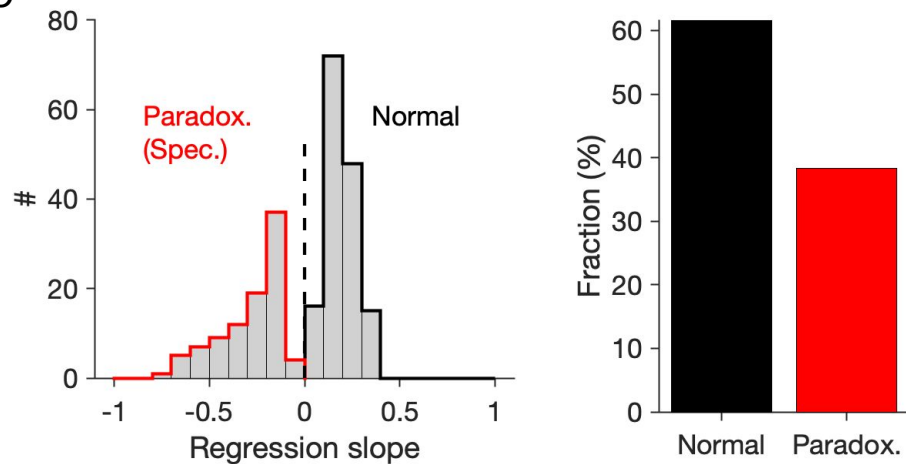

D

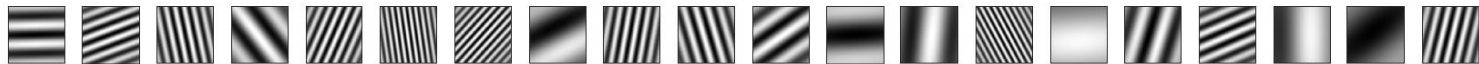

E

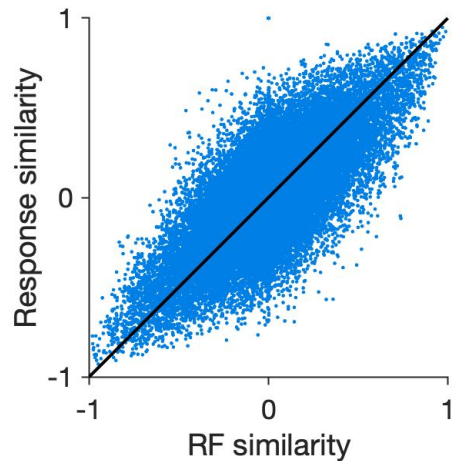

F

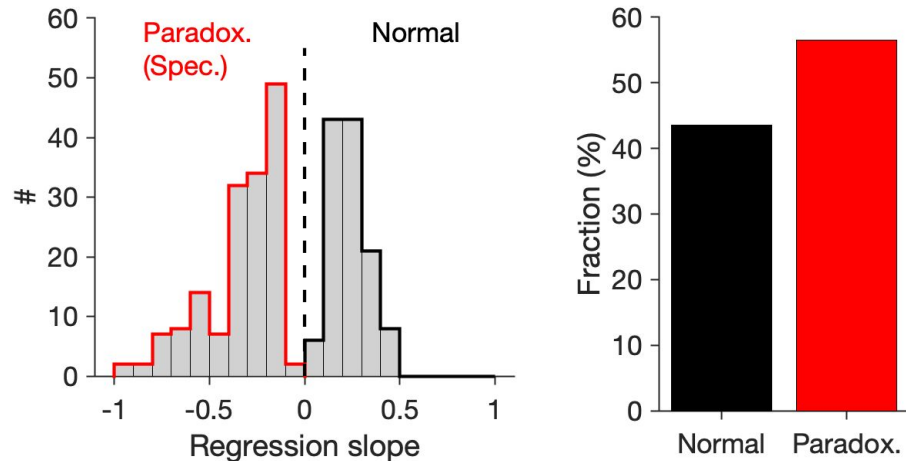

Supplement: supp [file elife-52757-supp-v1.zip › elife_poa_e52757_Figure_4_figure_supplement_1.pdf]

Patterned perturbation

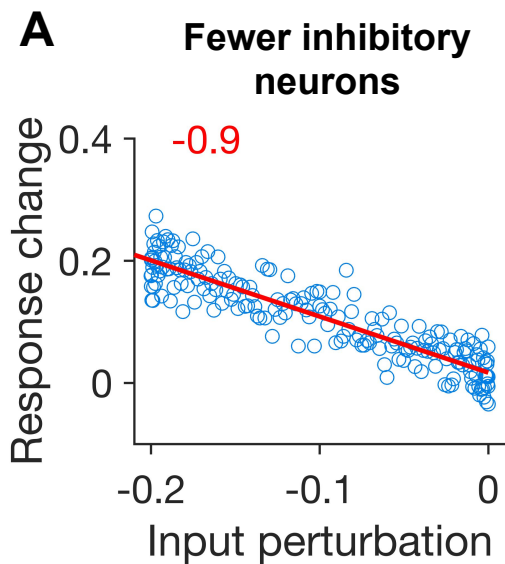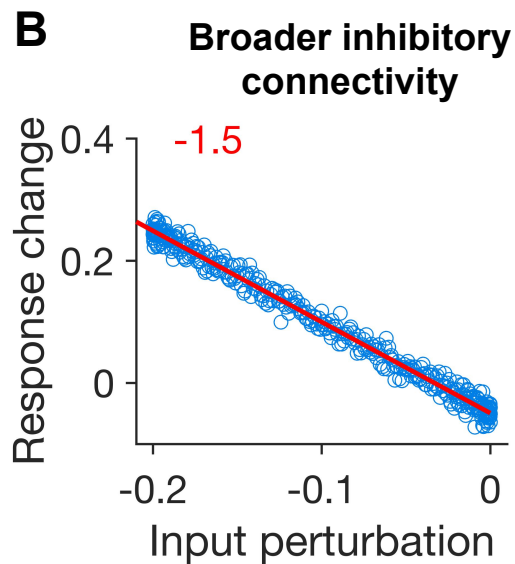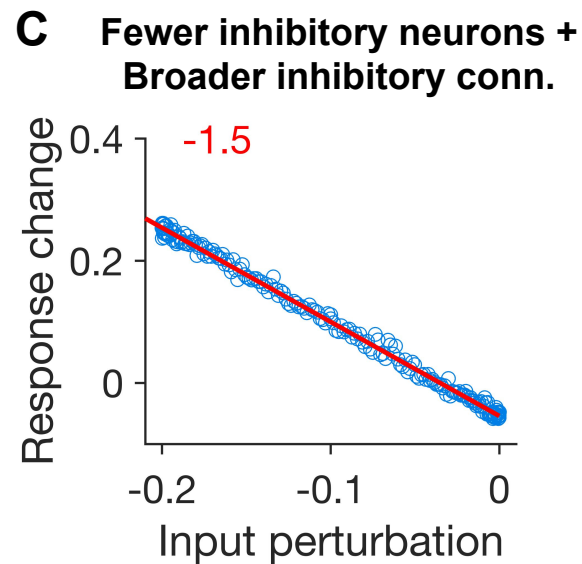

Randomized perturbation

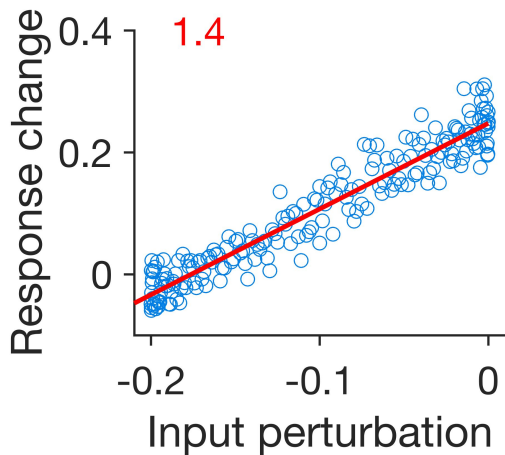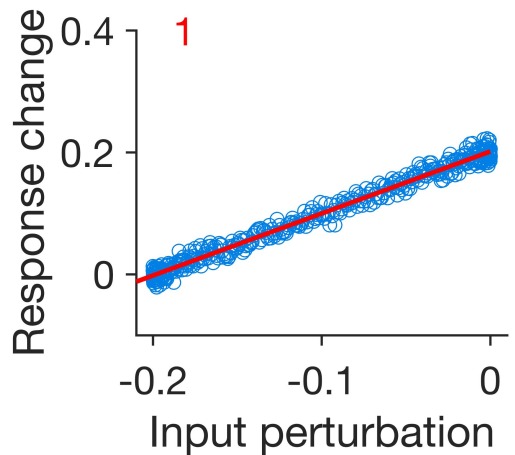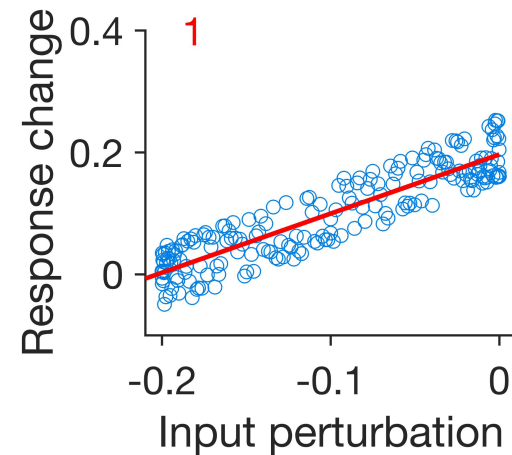

Supplement: supp [file elife-52757-supp-v1.zip › elife_poa_e52757_Figure_2_figure_supplement_4.pdf]

**A**

Spontaneous, specific EI (balanced)

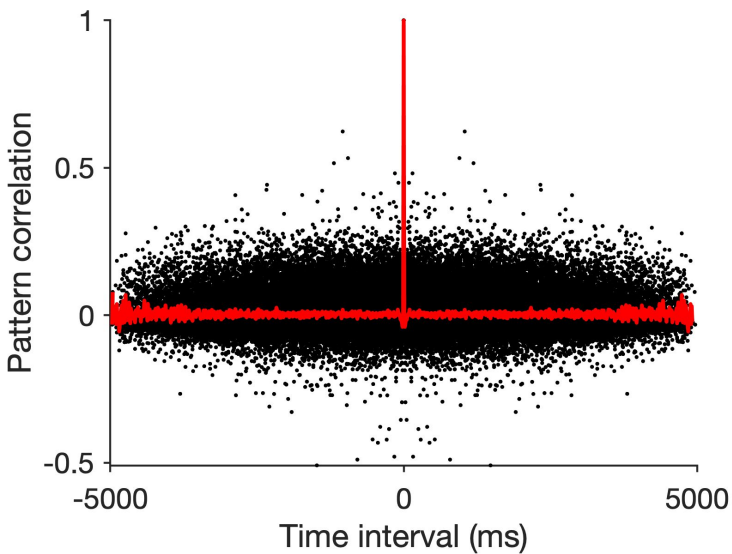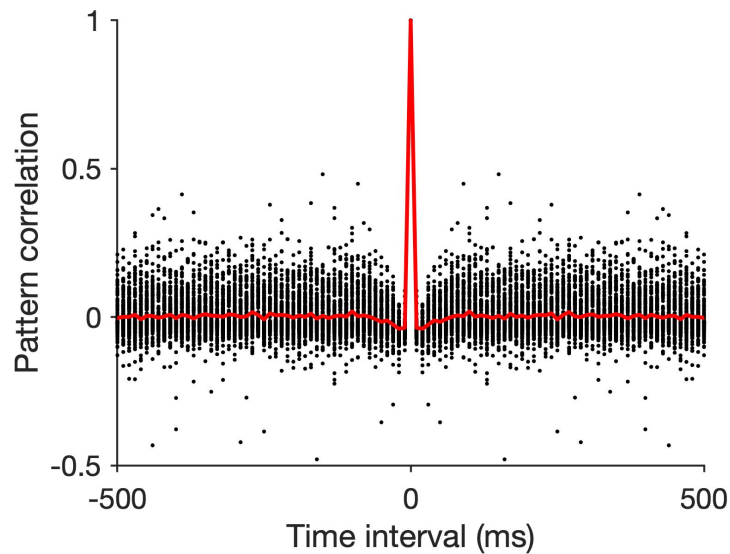**B**

Spontaneous, specific EI (broad inh.)

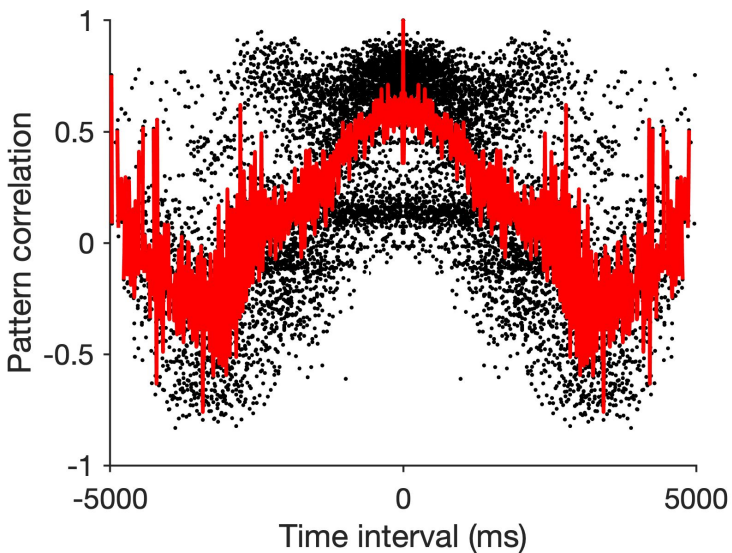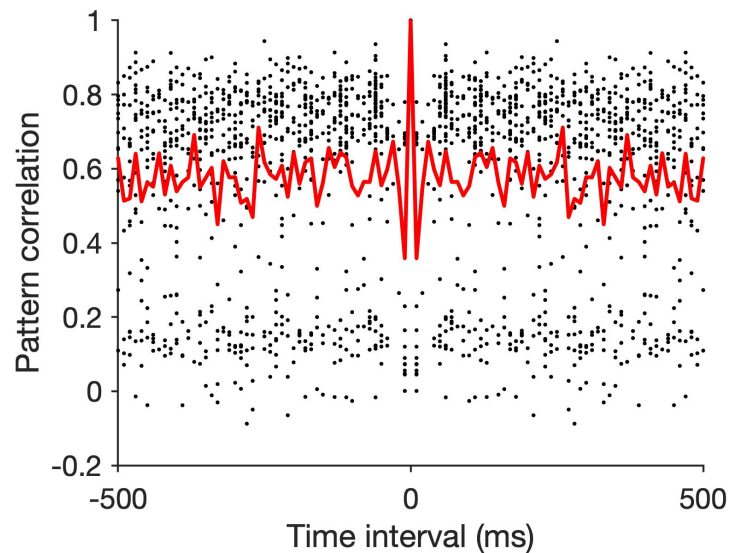

Supplement: supp [file elife-52757-supp-v1.zip › elife_poa_e52757_Figure_6_figure_supplement_1.pdf]

**A**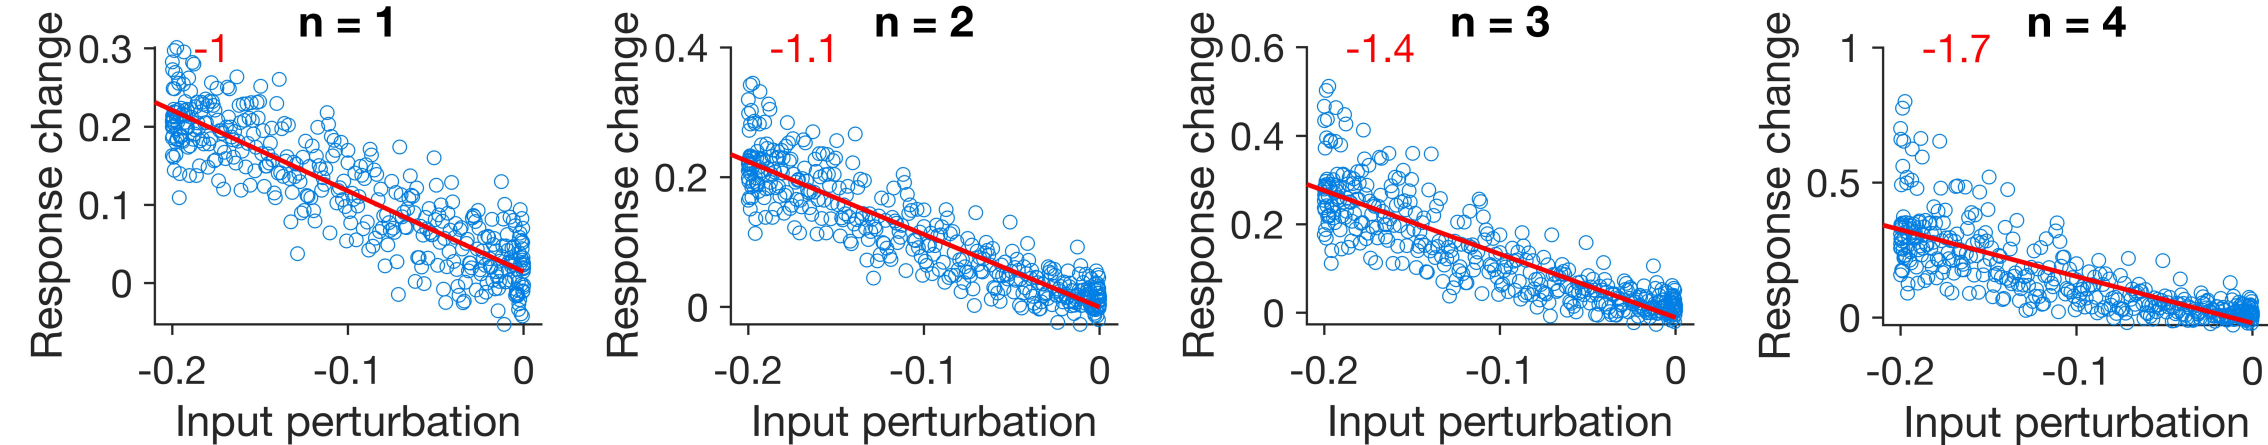**B** $n = 4$ 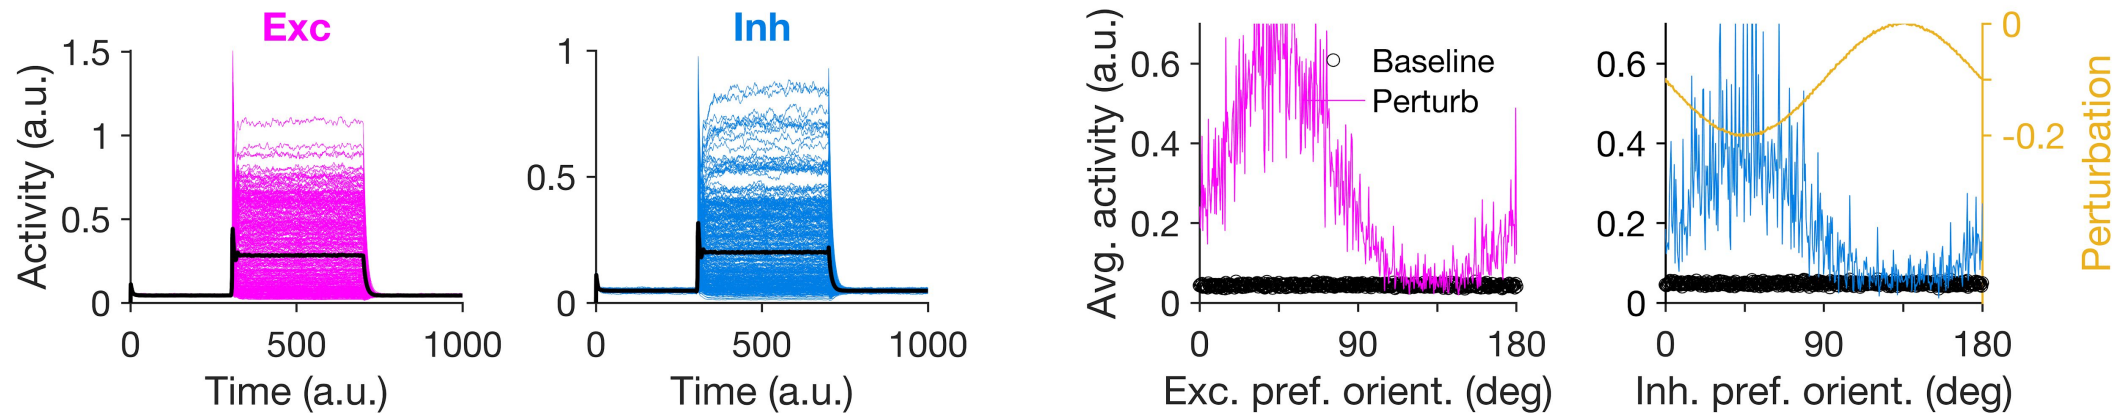

Supplement: supp [file elife-52757-supp-v1.zip › elife_poa_e52757_Figure_2_figure_supplement_6.pdf]

**A** 1D feature-specific connectivity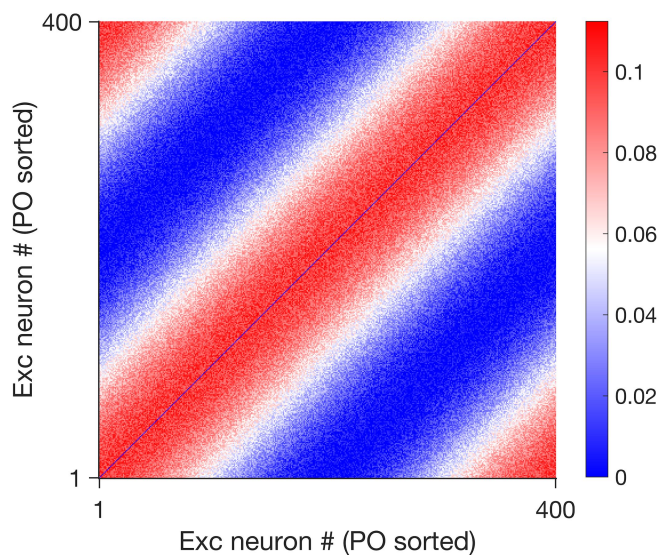**B** RF similarity-based connectivity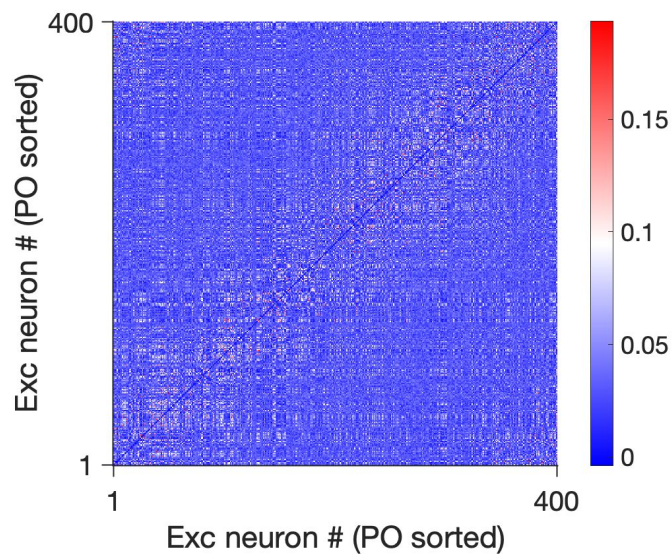**C**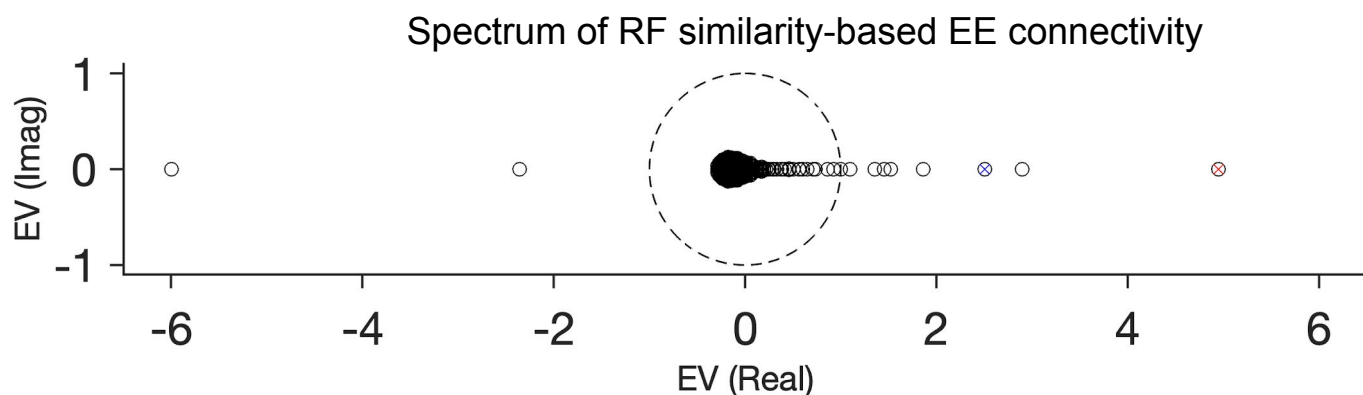**D**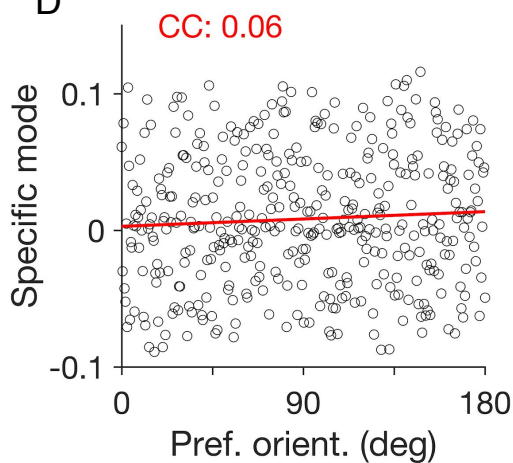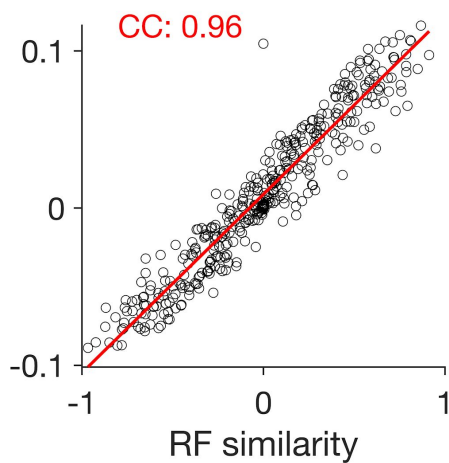**E**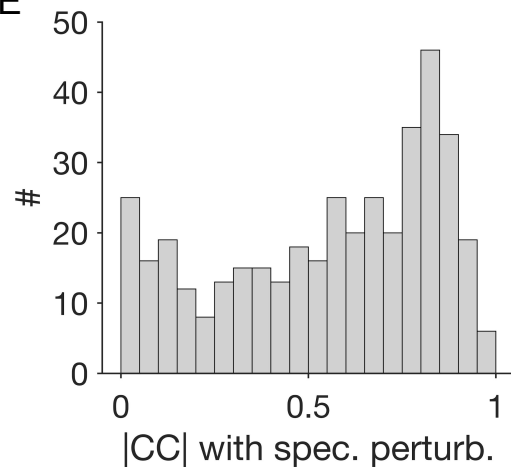**F**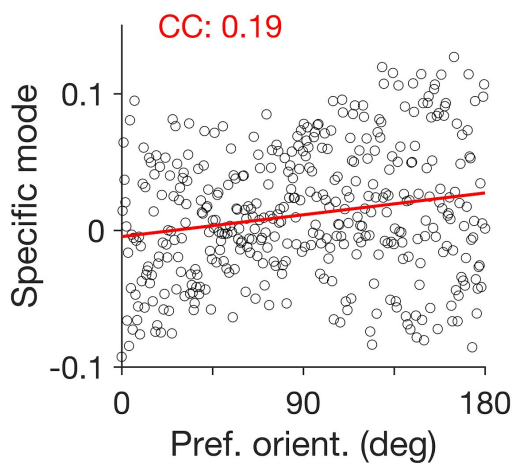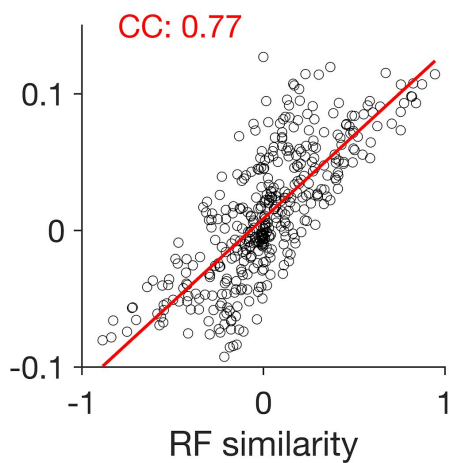**G**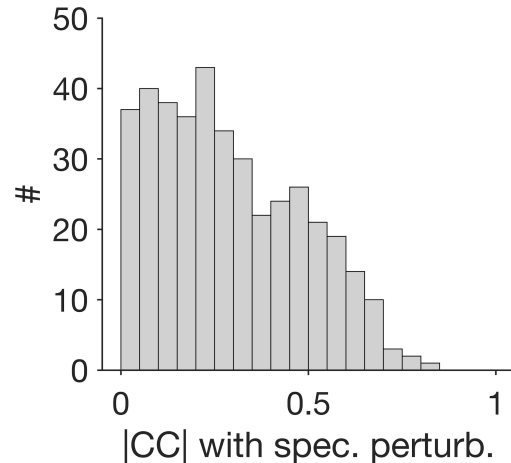

Supplement: supp [file elife-52757-supp-v1.zip]
